# Supplementary material for: A human impact metric for coastal ecosystems with application to seagrass beds in Atlantic Canada
Source: Atypon-hosted journal article supplement (doi:10.1139/facets-2018-0044), 2019-06-01
Supplement: facets-2018-0044_supplement2.csv [file facets-2018-0044_supplement2.csv]

bay	region_1	region_2	province	latitude	longitude	coastal.protection.raw	coastal.protection.standard.all	coastal.protection.standard.atlantic	coastal.protection.standard.gulf	urban.cover.raw	urban.cover.standard.all	urban.cover.standard.atlantic	urban.cover.standard.gulf	agri.cover.raw	agri.cover.standard.all	agri.cover.standard.atlantic	agri.cover.standard.gulf	urban.agri.cover.raw	pop.density.raw	pop.density.standard.all	pop.density.standard.atlantic	pop.density.standard.gulf	n.loading.raw	estimation.method	n.loading.standard.all	n.loading.standard.atlantic	n.loading.standard.gulf	delta.n.raw	delta.n.standard.all	delta.n.standard.atlantic	delta.n.standard.gulf	invasion.extent.raw	invasion.extent.standard.all	invasion.extent.standard.atlantic	invasion.extent.standard.gulf	fishing.activity.raw	fishing.activity.standard.all	fishing.activity.standard.atlantic	fishing.activity.standard.gulf
baie.verte	gulf	gulf NB+NS	NB	46.0485	-64.0543	7.610	0.076	NA	0.076	2.226	0.032	NA	0.032	5.701	0.082	NA	0.082	7.927	14.601	0.116	NA	0.110	29.580	regression.prediction	0.017	NA	0.017	0.0003	0.000	NA	0.000	0.090	0.21	NA	0.281	0.000	0.000	NA	0.000
basin.head	gulf	PEI	PEI	46.3831	-62.1124	68.390	0.684	NA	0.684	10.176	0.304	NA	0.304	41.482	0.599	NA	0.599	51.658	30.920	0.300	NA	0.295	470.858	regression.prediction	0.712	NA	0.712	0.0657	0.274	NA	0.274	0.200	0.48	NA	0.625	0.000	0.000	NA	0.000
bedeque	gulf	PEI	PEI	46.3543	-63.7790	2.180	0.022	NA	0.022	8.191	0.236	NA	0.236	68.821	0.994	NA	0.994	77.012	48.933	0.503	NA	0.500	550.580	regression.prediction	0.838	NA	0.838	0.0637	0.266	NA	0.266	0.150	0.36	NA	0.469	2.000	0.019	NA	0.019
bouctouche	gulf	gulf NB+NS	NB	46.4831	-64.6907	10.770	0.108	NA	0.108	6.180	0.168	NA	0.168	10.365	0.150	NA	0.149	16.545	35.557	0.353	NA	0.348	49.386	NLM	0.048	NA	0.048	0.0190	0.078	NA	0.079	0.000	0.00	NA	0.000	6.000	0.057	NA	0.057
brudenell	gulf	PEI	PEI	46.2037	-62.5968	10.320	0.103	NA	0.103	14.546	0.453	NA	0.453	41.764	0.603	NA	0.603	56.310	31.789	0.310	NA	0.305	347.380	regression.prediction	0.518	NA	0.518	0.0503	0.209	NA	0.210	0.320	0.76	NA	1.000	16.000	0.152	NA	0.152
cable.island.false.passage	atlantic	atlantic NS	NS	44.7413	-62.7897	19.710	0.197	0.357	NA	1.730	0.016	0.000	NA	0.010	0.000	0.001	NA	1.740	5.625	0.015	0.029	NA	39.560	NLM	0.032	0.107	NA	0.0128	0.052	0.205	NA	0.060	0.14	0.000	NA	20.000	0.190	0.355	NA
cap.pele	gulf	gulf NB+NS	NB	46.2216	-64.3992	0.000	0.000	NA	0.000	8.046	0.231	NA	0.231	27.396	0.396	NA	0.395	35.442	38.831	0.390	NA	0.385	284.720	regression.prediction	0.419	NA	0.419	0.0064	0.026	NA	0.026	0.070	0.17	NA	0.219	6.000	0.057	NA	0.057
cardigan	gulf	PEI	PEI	46.2150	-62.5172	2.470	0.025	NA	0.025	6.826	0.190	NA	0.190	21.236	0.307	NA	0.306	28.062	18.639	0.162	NA	0.156	104.120	regression.prediction	0.134	NA	0.134	0.0097	0.039	NA	0.040	0.320	0.76	NA	1.000	42.000	0.400	NA	0.400
caribou	gulf	gulf NB+NS	NS	45.7605	-62.6877	1.340	0.013	NA	0.013	3.460	0.075	NA	0.075	12.100	0.175	NA	0.174	15.560	14.715	0.118	NA	0.112	40.040	NLM	0.033	NA	0.033	0.0058	0.023	NA	0.023	0.100	0.24	NA	0.313	48.000	0.457	NA	0.457
charlottetown	gulf	PEI	PEI	46.2962	-63.0443	13.090	0.131	NA	0.131	11.306	0.343	NA	0.343	38.047	0.550	NA	0.549	49.353	92.994	1.000	NA	1.000	72.120	regression.prediction	0.084	NA	0.084	0.0143	0.059	NA	0.059	0.150	0.36	NA	0.469	18.000	0.171	NA	0.171
cocagne	gulf	gulf NB+NS	NB	46.3267	-64.6361	0.000	0.000	NA	0.000	5.920	0.159	NA	0.159	6.471	0.093	NA	0.093	12.391	39.512	0.397	NA	0.393	38.789	NLM	0.031	NA	0.031	0.0122	0.050	NA	0.050	0.020	0.05	NA	0.063	10.000	0.095	NA	0.095
covehead	gulf	PEI	PEI	46.4208	-63.1658	28.870	0.289	NA	0.289	30.553	1.000	NA	1.000	14.335	0.207	NA	0.207	44.888	46.357	0.474	NA	0.471	172.720	regression.prediction	0.242	NA	0.242	0.0587	0.245	NA	0.245	0.080	0.19	NA	0.250	16.000	0.152	NA	0.152
crescent.beach	atlantic	atlantic NS	NS	44.2381	-64.4007	0.000	0.000	0.000	NA	7.450	0.211	0.624	NA	4.760	0.069	0.434	NA	12.210	18.735	0.163	0.304	NA	31.828	NLM	0.020	0.007	NA	0.0028	0.010	0.002	NA	0.420	1.00	1.000	NA	40.000	0.381	1.000	NA
east.petpeswick	atlantic	atlantic NS	NS	44.7659	-63.1526	0.000	0.000	0.000	NA	6.990	0.195	0.574	NA	0.210	0.003	0.019	NA	7.200	24.764	0.231	0.431	NA	39.410	NLM	0.032	0.105	NA	0.0060	0.024	0.067	NA	0.260	0.62	0.556	NA	20.000	0.190	0.355	NA
freeland	gulf	PEI	PEI	46.6846	-63.9380	16.320	0.163	NA	0.163	11.480	0.349	NA	0.349	15.491	0.224	NA	0.223	26.971	22.489	0.205	NA	0.200	197.800	NLM	0.282	NA	0.282	0.0250	0.103	NA	0.104	0.060	0.14	NA	0.188	7.000	0.067	NA	0.067
jordan.bay	atlantic	atlantic NS	NS	43.7179	-65.1660	0.000	0.000	0.000	NA	3.060	0.061	0.145	NA	0.030	0.000	0.003	NA	3.090	7.639	0.038	0.071	NA	46.370	NLM	0.043	0.195	NA	0.0056	0.022	0.059	NA	0.350	0.83	0.806	NA	31.000	0.295	0.710	NA
kildare	gulf	PEI	PEI	46.8314	-64.0479	14.380	0.144	NA	0.144	6.123	0.166	NA	0.166	57.153	0.826	NA	0.825	63.276	20.950	0.188	NA	0.182	514.950	NLM	0.782	NA	0.782	0.0910	0.380	NA	0.380	0.090	0.21	NA	0.281	9.000	0.086	NA	0.086
kouchibouguac	gulf	gulf NB+NS	NB	46.8445	-64.9491	100.000	1.000	NA	1.000	1.275	0.000	NA	0.000	2.088	0.030	NA	0.030	3.363	6.995	0.031	NA	0.024	54.733	NLM	0.056	NA	0.056	0.0140	0.057	NA	0.058	0.000	0.00	NA	0.000	47.000	0.448	NA	0.448
lameque	gulf	gulf NB+NS	NB	47.7824	-64.6411	0.000	0.000	NA	0.000	16.870	0.533	NA	0.533	9.458	0.137	NA	0.136	26.328	70.160	0.743	NA	0.741	64.423	NLM	0.072	NA	0.072	0.0085	0.034	NA	0.035	0.010	0.02	NA	0.031	4.000	0.038	NA	0.038
lower.three.fathom	atlantic	atlantic NS	NS	44.6307	-63.2999	0.000	0.000	0.000	NA	7.980	0.229	0.682	NA	0.100	0.001	0.009	NA	8.080	32.552	0.319	0.595	NA	60.140	NLM	0.065	0.373	NA	0.0291	0.121	0.535	NA	0.300	0.71	0.667	NA	9.000	0.086	0.000	NA
mabou	gulf	gulf NB+NS	NS	46.0782	-61.4556	0.000	0.000	NA	0.000	1.720	0.015	NA	0.015	34.230	0.494	NA	0.494	35.950	4.885	0.007	NA	0.000	70.450	NLM	0.081	NA	0.081	0.0225	0.093	NA	0.093	0.020	0.05	NA	0.063	12.000	0.114	NA	0.114
merrigomish	gulf	gulf NB+NS	NS	45.6313	-62.4822	0.000	0.000	NA	0.000	4.630	0.115	NA	0.115	6.730	0.097	NA	0.097	11.360	10.200	0.067	NA	0.060	56.080	NLM	0.059	NA	0.058	0.0086	0.035	NA	0.035	0.070	0.17	NA	0.219	1.000	0.010	NA	0.010
midgell	gulf	PEI	PEI	46.4199	-62.6492	20.820	0.208	NA	0.208	4.376	0.106	NA	0.106	29.401	0.425	NA	0.424	33.777	9.876	0.063	NA	0.057	157.010	NLM	0.218	NA	0.218	0.0280	0.116	NA	0.116	0.180	0.43	NA	0.563	3.000	0.029	NA	0.029
mill.river	gulf	PEI	PEI	46.7684	-64.0819	9.750	0.098	NA	0.098	4.780	0.120	NA	0.120	48.160	0.696	NA	0.695	52.940	21.432	0.193	NA	0.188	637.420	NLM	0.975	NA	0.975	0.2390	1.000	NA	1.000	0.020	0.05	NA	0.063	0.000	0.000	NA	0.000
montague	gulf	PEI	PEI	46.1800	-62.5713	0.000	0.000	NA	0.000	7.039	0.197	NA	0.197	34.667	0.501	NA	0.500	41.706	25.708	0.242	NA	0.236	653.410	regression.prediction	1.000	NA	1.000	0.1103	0.461	NA	0.461	0.320	0.76	NA	1.000	79.000	0.752	NA	0.752
musquodoboit	atlantic	atlantic NS	NS	44.7050	-63.0922	9.600	0.096	0.174	NA	7.200	0.202	0.597	NA	2.200	0.032	0.201	NA	9.400	7.242	0.034	0.063	NA	108.560	NLM	0.141	1.000	NA	0.0524	0.218	1.008	NA	0.110	0.26	0.139	NA	20.000	0.190	0.355	NA
neguac	gulf	gulf NB+NS	NB	47.2548	-65.0593	14.390	0.144	NA	0.144	1.495	0.008	NA	0.008	0.799	0.012	NA	0.011	2.294	7.252	0.034	NA	0.027	85.400	regression.prediction	0.105	NA	0.105	0.0157	0.065	NA	0.065	0.000	0.00	NA	0.000	94.000	0.895	NA	0.895
pictou	gulf	gulf NB+NS	NS	45.6749	-62.7200	0.000	0.000	NA	0.000	9.370	0.276	NA	0.276	7.900	0.114	NA	0.114	17.270	36.836	0.367	NA	0.363	106.310	NLM	0.138	NA	0.138	0.0164	0.067	NA	0.068	0.070	0.17	NA	0.219	49.000	0.467	NA	0.467
pinette.river	gulf	PEI	PEI	46.0585	-62.9073	0.590	0.006	NA	0.006	5.050	0.129	NA	0.129	30.290	0.438	NA	0.437	35.340	14.151	0.111	NA	0.105	121.300	regression.prediction	0.161	NA	0.161	0.0119	0.049	NA	0.049	0.020	0.05	NA	0.063	3.000	0.029	NA	0.029
pokemouche	gulf	gulf NB+NS	NB	47.6738	-64.8209	4.120	0.041	NA	0.041	6.995	0.195	NA	0.195	8.956	0.129	NA	0.129	15.951	37.590	0.376	NA	0.371	57.170	regression.prediction	0.060	NA	0.060	0.0089	0.036	NA	0.036	0.000	0.00	NA	0.000	16.000	0.152	NA	0.152
port.joli	atlantic	atlantic NS	NS	43.8417	-64.8801	24.630	0.246	0.446	NA	2.840	0.053	0.121	NA	0.000	0.000	0.000	NA	2.840	5.001	0.008	0.015	NA	34.050	NLM	0.024	0.035	NA	0.0033	0.013	0.012	NA	0.270	0.64	0.583	NA	31.000	0.295	0.710	NA
port.mouton	atlantic	atlantic NS	NS	43.9085	-64.8187	7.930	0.079	0.144	NA	2.090	0.028	0.039	NA	0.000	0.000	0.000	NA	2.090	6.411	0.024	0.045	NA	48.570	NLM	0.047	0.223	NA	0.0036	0.014	0.018	NA	0.220	0.52	0.444	NA	39.000	0.371	0.968	NA
pugwash	gulf	gulf NB+NS	NS	45.8461	-63.6650	25.920	0.259	NA	0.259	3.380	0.072	NA	0.072	12.360	0.179	NA	0.178	15.740	13.300	0.102	NA	0.096	56.270	NLM	0.059	NA	0.059	0.0124	0.051	NA	0.051	0.040	0.10	NA	0.125	19.000	0.181	NA	0.181
richiboucto	gulf	gulf NB+NS	NB	46.6994	-64.7959	13.500	0.135	NA	0.135	3.510	0.076	NA	0.076	4.523	0.065	NA	0.065	8.033	17.100	0.145	NA	0.139	51.781	NLM	0.052	NA	0.052	0.0180	0.074	NA	0.074	0.010	0.02	NA	0.031	105.000	1.000	NA	1.000
river.philip	gulf	gulf NB+NS	NS	45.8500	-63.7390	0.000	0.000	NA	0.000	3.470	0.075	NA	0.075	67.580	0.976	NA	0.976	71.050	7.860	0.041	NA	0.034	215.500	regression.prediction	0.310	NA	0.310	0.0768	0.320	NA	0.321	0.040	0.10	NA	0.125	19.000	0.181	NA	0.181
rustico	gulf	PEI	PEI	46.4312	-63.2720	17.420	0.174	NA	0.174	8.395	0.243	NA	0.243	64.022	0.925	NA	0.925	72.417	28.426	0.272	NA	0.267	149.190	regression.prediction	0.205	NA	0.205	0.0517	0.215	NA	0.215	0.080	0.19	NA	0.250	28.000	0.267	NA	0.267
sambro	atlantic	atlantic NS	NS	44.4550	-63.5890	2.740	0.027	0.050	NA	8.940	0.262	0.786	NA	0.040	0.001	0.004	NA	8.980	51.824	0.536	1.000	NA	57.760	NLM	0.061	0.342	NA	0.0078	0.031	0.103	NA	0.290	0.69	0.639	NA	27.000	0.257	0.581	NA
second.peninsula	atlantic	atlantic NS	NS	44.3967	-64.2806	0.000	0.000	0.000	NA	10.900	0.329	1.000	NA	10.960	0.158	1.000	NA	21.860	28.884	0.277	0.518	NA	46.630	NLM	0.044	0.198	NA	0.0044	0.017	0.034	NA	0.280	0.67	0.611	NA	36.000	0.343	0.871	NA
shediac	gulf	gulf NB+NS	NB	46.2388	-64.5240	0.024	0.000	NA	0.000	9.026	0.265	NA	0.265	15.408	0.223	NA	0.222	24.434	49.677	0.512	NA	0.508	53.180	regression.prediction	0.054	NA	0.054	0.0183	0.075	NA	0.076	0.070	0.17	NA	0.219	4.000	0.038	NA	0.038
souris	gulf	PEI	PEI	46.3501	-62.2770	0.000	0.000	NA	0.000	8.559	0.249	NA	0.249	39.255	0.567	NA	0.567	47.814	44.609	0.455	NA	0.451	418.960	regression.prediction	0.630	NA	0.630	0.0223	0.092	NA	0.092	0.210	0.50	NA	0.656	37.000	0.352	NA	0.352
south.lake	gulf	PEI	PEI	46.4123	-62.0540	38.430	0.384	NA	0.384	6.567	0.181	NA	0.181	40.439	0.584	NA	0.584	47.006	21.351	0.193	NA	0.187	123.185	regression.prediction	0.164	NA	0.164	0.0216	0.089	NA	0.089	0.210	0.50	NA	0.656	0.000	0.000	NA	0.000
southwest	gulf	PEI	PEI	46.4800	-63.5000	2.880	0.029	NA	0.029	10.256	0.307	NA	0.307	69.228	1.000	NA	1.000	79.484	27.626	0.263	NA	0.258	353.010	NLM	0.527	NA	0.526	0.0760	0.317	NA	0.317	0.050	0.12	NA	0.156	36.000	0.343	NA	0.343
st.louis.de.kent	gulf	gulf NB+NS	NB	46.7663	-64.9112	100.000	1.000	NA	1.000	2.490	0.041	NA	0.041	2.355	0.034	NA	0.033	4.845	13.767	0.107	NA	0.101	26.880	regression.prediction	0.013	NA	0.012	0.0114	0.047	NA	0.047	0.000	0.00	NA	0.000	36.000	0.343	NA	0.343
st.margarets.bay	atlantic	atlantic NS	NS	44.6388	-63.9576	0.550	0.006	0.010	NA	7.560	0.215	0.636	NA	0.000	0.000	0.000	NA	7.560	29.515	0.285	0.531	NA	43.660	NLM	0.039	0.160	NA	0.0040	0.016	0.026	NA	0.360	0.86	0.833	NA	40.000	0.381	1.000	NA
st.marys.bay	gulf	PEI	PEI	46.1662	-62.5388	4.820	0.048	NA	0.048	5.667	0.150	NA	0.150	23.649	0.342	NA	0.341	29.316	15.732	0.129	NA	0.123	66.280	regression.prediction	0.075	NA	0.075	0.0105	0.043	NA	0.043	0.320	0.76	NA	1.000	7.000	0.067	NA	0.067
st.simon.north	gulf	gulf NB+NS	NB	47.7488	-64.8100	0.000	0.000	NA	0.000	1.289	0.000	NA	0.000	0.041	0.001	NA	0.000	1.330	34.446	0.340	NA	0.336	18.944	regression.prediction	0.000	NA	0.000	0.0017	0.006	NA	0.006	0.010	0.02	NA	0.031	0.000	0.000	NA	0.000
st.simon.south	gulf	gulf NB+NS	NB	47.7199	-64.7609	0.000	0.000	NA	0.000	1.289	0.000	NA	0.000	0.041	0.001	NA	0.000	1.330	34.446	0.340	NA	0.336	18.944	NLM	0.000	NA	0.000	0.0027	0.010	NA	0.010	0.010	0.02	NA	0.031	0.000	0.000	NA	0.000
stanley.trout	gulf	PEI	PEI	46.4448	-63.4732	3.540	0.035	NA	0.035	8.954	0.262	NA	0.262	48.883	0.706	NA	0.706	57.837	21.342	0.192	NA	0.187	189.590	NLM	0.269	NA	0.269	0.0320	0.133	NA	0.133	0.100	0.24	NA	0.313	4.000	0.038	NA	0.038
tabusintac	gulf	gulf NB+NS	NB	47.3763	-64.9381	25.550	0.256	NA	0.256	2.076	0.027	NA	0.027	3.509	0.051	NA	0.050	5.585	8.707	0.050	NA	0.043	35.627	NLM	0.026	NA	0.026	0.0067	0.027	NA	0.027	0.000	0.00	NA	0.000	7.000	0.067	NA	0.067
tatamagouche	gulf	gulf NB+NS	NS	45.7568	-63.0844	0.000	0.000	NA	0.000	2.680	0.048	NA	0.048	13.250	0.191	NA	0.191	15.930	16.770	0.141	NA	0.135	34.630	NLM	0.025	NA	0.025	0.0040	0.016	NA	0.016	0.010	0.02	NA	0.031	2.000	0.019	NA	0.019
taylors.head	atlantic	atlantic NS	NS	44.8235	-62.5764	55.250	0.553	1.000	NA	2.580	0.045	0.093	NA	0.000	0.000	0.000	NA	2.580	4.266	0.000	0.000	NA	31.320	NLM	0.020	0.000	NA	0.0027	0.010	0.000	NA	0.060	0.14	0.000	NA	23.000	0.219	0.452	NA
tracadie	gulf	gulf NB+NS	NB	47.5641	-64.8885	2.244	0.022	NA	0.022	5.784	0.154	NA	0.154	9.345	0.135	NA	0.134	15.129	43.102	0.438	NA	0.434	49.170	regression.prediction	0.048	NA	0.048	0.0158	0.065	NA	0.065	0.000	0.00	NA	0.000	57.000	0.543	NA	0.543
