# Supplementary material for: A human impact metric for coastal ecosystems with application to seagrass beds in Atlantic Canada
Source: Atypon-hosted journal article supplement (doi:10.1139/facets-2018-0044), 2019-06-01
Supplement: facets-2018-0044_supplement3.csv [file facets-2018-0044_supplement3.csv]

bay	meadow.ID	region_1	region_2	province	latitude	longitude	midfield.shellfish.aquaculture	nearfield.shellfish.aquaculture	water.quality.raw	water.quality.standard.all	water.quality.standard.atlantic	water.quality.standard.gulf	OWS.raw	OWS.standard.all	OWS.standard.atlantic	OWS.standard.gulf	riparian.alteration.raw	riparian.alteration.standard.all	riparian.alteration.standard.atlantic	riparian.alteration.standard.gulf
baie.verte	baie.verte.A	gulf	Gulf NS + NB	NB	46.0485	-64.0543	0	0	27.071	0.332	NA	0.332	0	0.000	NA	0	2.7	0.027	NA	0.027
baie.verte	baie.verte.C	gulf	Gulf NS + NB	NB	46.052	-64.082	0	0	42.808	0.525	NA	0.525	0	0.000	NA	0	18.41	0.184	NA	0.184
baie.verte	baie.verte.B	gulf	Gulf NS + NB	NB	46.0523	-64.0567	0	0	42.808	0.525	NA	0.525	0	0.000	NA	0	11.9	0.119	NA	0.119
basin.head	basin.head.A	gulf	PEI	PEI	46.3826	-62.11	0	0	8.1	0.099	NA	0.099	0.473	0.140	NA	0.14	43.6	0.436	NA	0.436
basin.head	basin.head.B	gulf	PEI	PEI	46.3831	-62.1124	0	0	7.9	0.097	NA	0.097	0.473	0.140	NA	0.14	45.86	0.459	NA	0.459
basin.head	basin.head.C	gulf	PEI	PEI	46.3852	-62.1167	0	0	8	0.098	NA	0.098	0.473	0.140	NA	0.14	49.64	0.496	NA	0.496
bedeque	bedeque.E	gulf	PEI	PEI	46.3761	-63.786	0	0	5.1	0.063	NA	0.063	1.223	0.362	NA	0.362	79.18	0.792	NA	0.792
bedeque	bedeque.A	gulf	PEI	PEI	46.3874	-63.77	0	0	31.7	0.389	NA	0.389	2.205	0.653	NA	0.653	81.73	0.817	NA	0.817
bedeque	bedeque.B	gulf	PEI	PEI	46.3543	-63.779	0	0	4.4	0.054	NA	0.054	0	0.000	NA	0	54.22	0.542	NA	0.542
bedeque	bedeque.C	gulf	PEI	PEI	46.349	-63.7617	0	0	6.7	0.082	NA	0.082	0	0.000	NA	0	35.38	0.354	NA	0.354
bedeque	bedeque.D	gulf	PEI	PEI	46.3588	-63.7553	0	0	6.7	0.082	NA	0.082	0	0.000	NA	0	62.16	0.622	NA	0.622
bouctouche	bouctouche.D	gulf	Gulf NS + NB	NB	46.4624	-64.7266	0	0	13.028	0.16	NA	0.16	0.323	0.096	NA	0.096	53.02	0.530	NA	0.530
bouctouche	bouctouche.C	gulf	Gulf NS + NB	NB	46.4698	-64.714	1	0	8.142	0.1	NA	0.1	0.84	0.249	NA	0.249	67.38	0.674	NA	0.674
bouctouche	bouctouche.B	gulf	Gulf NS + NB	NB	46.4832	-64.691	1	0	9.926	0.122	NA	0.122	0.353	0.104	NA	0.104	63.06	0.631	NA	0.631
bouctouche	bouctouche.A	gulf	Gulf NS + NB	NB	46.4997	-64.6765	1	1	4.638	0.057	NA	0.057	0	0.000	NA	0	77.21	0.772	NA	0.772
brudenell	brudenell.B	gulf	PEI	PEI	46.1935	-62.5865	0	0	7.9	0.097	NA	0.097	0.065	0.019	NA	0.019	92.45	0.925	NA	0.925
brudenell	brudenell.A	gulf	PEI	PEI	46.2037	-62.5968	0	0	9.4	0.115	NA	0.115	0.063	0.019	NA	0.019	99.31	0.993	NA	0.993
brudenell	brudenell.D	gulf	PEI	PEI	46.1834	-62.547	1	0	3.9	0.048	NA	0.048	0.422	0.125	NA	0.125	84.85	0.849	NA	0.849
brudenell	brudenell.C	gulf	PEI	PEI	46.1975	-62.575	1	0	12.5	0.153	NA	0.153	0.083	0.025	NA	0.025	84.79	0.848	NA	0.848
cable.island	cable.island	atlantic	atlantic NS	NS	44.7413	-62.7897	0	0	2.467	0.03	0.171	NA	0	0.000	0	NA	0	0.000	0.000	NA
cap.pele	cap.pele	gulf	Gulf NS + NB	NB	46.2216	-64.3992	0	0	10.714	0.131	NA	0.131	0.328	0.097	NA	0.097	51.81	0.518	NA	0.518
cardigan	cardigan.K	gulf	PEI	PEI	46.2345	-62.6122	0	0	27.2	0.333	NA	0.333	0.505	0.149	NA	0.149	85.15	0.852	NA	0.852
cardigan	cardigan.B	gulf	PEI	PEI	46.215	-62.5172	1	0	7.1	0.087	NA	0.087	0.023	0.007	NA	0.007	73.27	0.733	NA	0.733
cardigan	cardigan.D	gulf	PEI	PEI	46.218	-62.5345	1	0	3.9	0.048	NA	0.048	0.057	0.017	NA	0.017	70.27	0.703	NA	0.703
cardigan	cardigan.E	gulf	PEI	PEI	46.2252	-62.5528	1	0	5.9	0.072	NA	0.072	0.043	0.013	NA	0.013	86.41	0.864	NA	0.864
cardigan	cardigan.F	gulf	PEI	PEI	46.2212	-62.5713	1	0	4.2	0.051	NA	0.051	0.007	0.002	NA	0.002	79.33	0.793	NA	0.793
cardigan	cardigan.C	gulf	PEI	PEI	46.2127	-62.5343	1	0	3.6	0.044	NA	0.044	0.057	0.017	NA	0.017	74.02	0.740	NA	0.740
cardigan	cardigan.G	gulf	PEI	PEI	46.2243	-62.5817	1	0	4.7	0.058	NA	0.058	0.004	0.001	NA	0.001	86.11	0.861	NA	0.861
cardigan	cardigan.H	gulf	PEI	PEI	46.2253	-62.596	1	0	4.2	0.051	NA	0.051	0.27	0.080	NA	0.08	87.3	0.873	NA	0.873
cardigan	cardigan.A	gulf	PEI	PEI	46.201	-62.5243	1	0	4.3	0.053	NA	0.053	0.024	0.007	NA	0.007	58.8	0.588	NA	0.588
cardigan	cardigan.I	gulf	PEI	PEI	46.2313	-62.6027	1	0	6.8	0.083	NA	0.083	0.364	0.108	NA	0.108	84.53	0.845	NA	0.845
cardigan	cardigan.J	gulf	PEI	PEI	46.2315	-62.6107	1	0	18.1	0.222	NA	0.222	0.44	0.130	NA	0.13	87.3	0.873	NA	0.873
caribou	caribou.D	gulf	Gulf NS + NB	NS	45.7542	-62.7428	0	0	3.026	0.037	NA	0.037	0	0.000	NA	0	55.8	0.558	NA	0.558
caribou	caribou.F	gulf	Gulf NS + NB	NS	45.7377	-62.7423	0	0	5.32	0.065	NA	0.065	0.05	0.015	NA	0.015	30.76	0.308	NA	0.308
caribou	caribou.B	gulf	Gulf NS + NB	NS	45.7555	-62.6983	0	0	8.612	0.106	NA	0.106	0	0.000	NA	0	50.49	0.505	NA	0.505
caribou	caribou.C	gulf	Gulf NS + NB	NS	45.7538	-62.7062	0	0	2.11	0.026	NA	0.026	0	0.000	NA	0	27.78	0.278	NA	0.278
caribou	caribou.A	gulf	Gulf NS + NB	NS	45.7605	-62.6877	0	0	4.57	0.056	NA	0.056	0	0.000	NA	0	51.79	0.518	NA	0.518
caribou	caribou.H	gulf	Gulf NS + NB	NS	45.7372	-62.703	0	0	5.105	0.063	NA	0.063	0	0.000	NA	0	25.61	0.256	NA	0.256
caribou	caribou.E	gulf	Gulf NS + NB	NS	45.7582	-62.77	1	0	6.381	0.078	NA	0.078	0.12	0.036	NA	0.036	63.45	0.635	NA	0.635
caribou	caribou.I	gulf	Gulf NS + NB	NS	45.7405	-62.6712	1	0	3.308	0.041	NA	0.041	0.144	0.043	NA	0.043	5.86	0.059	NA	0.059
caribou	caribou.G	gulf	Gulf NS + NB	NS	45.737	-62.72	1	0	5.52	0.068	NA	0.068	0	0.000	NA	0	47.81	0.478	NA	0.478
charlottetown	charlottetown.A	gulf	PEI	PEI	46.2156	-63.12	0	0	5.5	0.067	NA	0.067	1.74	0.515	NA	0.515	94.29	0.943	NA	0.943
charlottetown	charlottetown.B	gulf	PEI	PEI	46.2248	-63.157	0	0	5.5	0.067	NA	0.067	0.02	0.006	NA	0.006	83.52	0.835	NA	0.835
charlottetown	charlottetown.C	gulf	PEI	PEI	46.2532	-63.097	0	0	30.8	0.378	NA	0.378	0.812	0.240	NA	0.24	29.17	0.292	NA	0.292
charlottetown	charlottetown.D	gulf	PEI	PEI	46.2962	-63.0443	0	0	5.2	0.064	NA	0.064	0	0.000	NA	0	19	0.190	NA	0.190
cocagne	cocagne.G	gulf	Gulf NS + NB	NB	46.3267	-64.6361	0	0	6.375	0.078	NA	0.078	0.555	0.164	NA	0.164	48.29	0.483	NA	0.483
cocagne	cocagne.F	gulf	Gulf NS + NB	NB	46.3332	-64.618	0	0	15.089	0.185	NA	0.185	1.35	0.400	NA	0.4	71.95	0.720	NA	0.720
cocagne	cocagne.E	gulf	Gulf NS + NB	NB	46.3336	-64.6028	1	0	21.786	0.267	NA	0.267	0	0.000	NA	0	67.01	0.670	NA	0.670
cocagne	cocagne.H	gulf	Gulf NS + NB	NB	46.3672	-64.6174	1	0	3.914	0.048	NA	0.048	0	0.000	NA	0	86.32	0.863	NA	0.863
cocagne	cocagne.A	gulf	Gulf NS + NB	NB	46.352	-64.573	1	0	6.375	0.078	NA	0.078	0.351	0.104	NA	0.104	74.78	0.748	NA	0.748
cocagne	cocagne.B	gulf	Gulf NS + NB	NB	46.3385	-64.5735	1	0	1.943	0.024	NA	0.024	0	0.000	NA	0	34.33	0.343	NA	0.343
cocagne	cocagne.D	gulf	Gulf NS + NB	NB	46.3325	-64.5813	1	0	21.786	0.267	NA	0.267	0	0.000	NA	0	38.6	0.386	NA	0.386
cocagne	cocagne.C	gulf	Gulf NS + NB	NB	46.3327	-64.5736	1	0	10.139	0.124	NA	0.124	0.001	0.000	NA	0	23.62	0.236	NA	0.236
covehead	covehead	gulf	PEI	PEI	46.4208	-63.1658	1	0	3.4	0.042	NA	0.042	0.186	0.055	NA	0.055	30.06	0.301	NA	0.301
crescent.beach	crescent.beach	atlantic	atlantic NS	NS	44.2381	-64.4007	0	0	3.663	0.045	0.254	NA	0.005	0.001	0.007	NA	26.2	0.262	0.291	NA
east.petpeswick	east.petpeswick	atlantic	atlantic NS	NS	44.7659	-63.1526	0	0	0	0	0	NA	0.133	0.039	0.187	NA	89.97	0.900	1.000	NA
false.passage	false.passage	atlantic	atlantic NS	NS	44.7444	-62.7965	0	0	3.44	0.042	0.238	NA	0	0.000	0	NA	0	0.000	0.000	NA
freeland	freeland	gulf	PEI	PEI	46.6846	-63.938	1	1	4.6	0.056	NA	0.056	0	0.000	NA	0	60.65	0.607	NA	0.607
jordan.bay	jordan.bay	atlantic	atlantic NS	NS	43.7179	-65.166	0	0	0	0	0	NA	0.068	0.020	0.095	NA	33.28	0.333	0.370	NA
kildare	kildare	gulf	PEI	PEI	46.8314	-64.0479	1	0	3.2	0.039	NA	0.039	0.377	0.112	NA	0.112	55.84	0.558	NA	0.558
kouchibouguac	kouchibouguac.C	gulf	Gulf NS + NB	NB	46.8408	-64.9205	0	0	8.095	0.099	NA	0.099	0.067	0.020	NA	0.02	0	0.000	NA	0.000
kouchibouguac	kouchibouguac.J	gulf	Gulf NS + NB	NB	46.8417	-64.9378	0	0	4.8	0.059	NA	0.059	0	0.000	NA	0	3.86	0.039	NA	0.039
kouchibouguac	kouchibouguac.K	gulf	Gulf NS + NB	NB	46.8445	-64.9491	0	0	8.085	0.099	NA	0.099	0	0.000	NA	0	0.01	0.000	NA	0.000
kouchibouguac	kouchibouguac.A	gulf	Gulf NS + NB	NB	46.8335	-64.917	0	0	8.085	0.099	NA	0.099	0.077	0.023	NA	0.023	0.03	0.000	NA	0.000
kouchibouguac	kouchibouguac.B	gulf	Gulf NS + NB	NB	46.8363	-64.9218	0	0	8.867	0.109	NA	0.109	0.006	0.002	NA	0.002	1.52	0.015	NA	0.015
kouchibouguac	kouchibougauc.I	gulf	Gulf NS + NB	NB	46.8368	-64.9327	0	0	8.867	0.109	NA	0.109	0.087	0.026	NA	0.026	4.08	0.041	NA	0.041
kouchibouguac	kouchibouguac.E	gulf	Gulf NS + NB	NB	46.8322	-64.9378	0	0	8.085	0.099	NA	0.099	0.149	0.044	NA	0.044	3.01	0.030	NA	0.030
kouchibouguac	kouchibouguac.L	gulf	Gulf NS + NB	NB	46.8532	-64.9413	0	0	5.171	0.063	NA	0.063	0	0.000	NA	0	0.01	0.000	NA	0.000
kouchibouguac	kouchibouguac.F	gulf	Gulf NS + NB	NB	46.83	-64.9403	0	0	8.085	0.099	NA	0.099	0.236	0.070	NA	0.07	2.8	0.028	NA	0.028
kouchibouguac	kouchibouguac.D	gulf	Gulf NS + NB	NB	46.8322	-64.9297	0	0	13.804	0.169	NA	0.169	0.144	0.043	NA	0.043	4.05	0.041	NA	0.041
kouchibouguac	kouchibouguac.G	gulf	Gulf NS + NB	NB	46.8258	-64.946	0	0	17.881	0.219	NA	0.219	0	0.000	NA	0	0.11	0.001	NA	0.001
kouchibouguac	kouchibouguac.H	gulf	Gulf NS + NB	NB	46.8255	-64.954	0	0	17.881	0.219	NA	0.219	0	0.000	NA	0	0.01	0.000	NA	0.000
kouchibouguac	kouchibouguac.N	gulf	Gulf NS + NB	NB	46.8665	-64.9312	0	0	3.971	0.049	NA	0.049	0	0.000	NA	0	0	0.000	NA	0.000
kouchibouguac	kouchibouguac.O	gulf	Gulf NS + NB	NB	46.8693	-64.9165	0	0	3.971	0.049	NA	0.049	0	0.000	NA	0	0	0.000	NA	0.000
kouchibouguac	kouchibouguac.M	gulf	Gulf NS + NB	NB	46.8555	-64.9202	0	0	2.485	0.03	NA	0.03	0	0.000	NA	0	0	0.000	NA	0.000
lameque	lameque.A	gulf	Gulf NS + NB	NB	47.7855	-64.6843	0	0	2.377	0.029	NA	0.029	0	0.000	NA	0	51.97	0.520	NA	0.520
lameque	lameque.C	gulf	Gulf NS + NB	NB	47.788	-64.6375	0	0	4.844	0.059	NA	0.059	0.884	0.262	NA	0.262	36.15	0.362	NA	0.362
lameque	lameque.B	gulf	Gulf NS + NB	NB	47.7956	-64.6753	1	0	12.155	0.149	NA	0.149	0	0.000	NA	0	22.26	0.223	NA	0.223
lameque	lameque.D	gulf	Gulf NS + NB	NB	47.7824	-64.6411	1	0	4.844	0.059	NA	0.059	0.957	0.283	NA	0.283	39.88	0.399	NA	0.399
lower.three.fathom	lower.three.fathom	atlantic	atlantic NS	NS	44.6307	-63.2999	0	0	0	0	0	NA	0	0.000	0	NA	19.74	0.197	0.219	NA
mabou	mabou.C	gulf	Gulf NS + NB	NS	46.0724	-61.4136	0	0	81.565	1	NA	1	0	0.000	NA	0	27.05	0.271	NA	0.271
mabou	mabou.D	gulf	Gulf NS + NB	NS	46.0667	-61.4275	0	0	20.963	0.257	NA	0.257	0	0.000	NA	0	26.11	0.261	NA	0.261
mabou	mabou.B	gulf	Gulf NS + NB	NS	46.0782	-61.4556	1	0	22.633	0.277	NA	0.277	0.581	0.172	NA	0.172	14.28	0.143	NA	0.143
mabou	mabou.A	gulf	Gulf NS + NB	NS	46.0859	-61.4588	1	0	35.797	0.439	NA	0.439	0.669	0.198	NA	0.198	27.59	0.276	NA	0.276
merrigomish	merrigomish.B	gulf	Gulf NS + NB	NS	45.6313	-62.4822	0	0	2.811	0.034	NA	0.034	0.011	0.003	NA	0.003	5.68	0.057	NA	0.057
merrigomish	merrigomish.C	gulf	Gulf NS + NB	NS	45.681	-62.3482	0	0	2.811	0.034	NA	0.034	0	0.000	NA	0	33.38	0.334	NA	0.334
merrigomish	merrigomish.A	gulf	Gulf NS + NB	NS	45.6023	-62.515	0	0	2.811	0.034	NA	0.034	0.107	0.032	NA	0.032	16.49	0.165	NA	0.165
midgell	midgell	gulf	PEI	PEI	46.4199	-62.6492	1	0	3.8	0.047	NA	0.047	0.022	0.007	NA	0.007	67.34	0.673	NA	0.673
mill.river	mill.river	gulf	PEI	PEI	46.7684	-64.0819	1	0	2.1	0.026	NA	0.026	0.039	0.012	NA	0.012	84.58	0.846	NA	0.846
montague	montague.E	gulf	PEI	PEI	46.1703	-62.5597	1	0	4.5	0.055	NA	0.055	0.335	0.099	NA	0.099	85.66	0.857	NA	0.857
montague	montague.F	gulf	PEI	PEI	46.1785	-62.5612	1	0	4.5	0.055	NA	0.055	0.395	0.117	NA	0.117	84.38	0.844	NA	0.844
montague	montague.D	gulf	PEI	PEI	46.18	-62.5713	1	0	6.8	0.083	NA	0.083	0.239	0.071	NA	0.071	88.96	0.890	NA	0.890
montague	montague.C	gulf	PEI	PEI	46.1733	-62.5795	1	0	6.2	0.076	NA	0.076	0.104	0.031	NA	0.031	93.81	0.938	NA	0.938
montague	montague.B	gulf	PEI	PEI	46.174	-62.5877	1	0	10.5	0.129	NA	0.129	0.122	0.036	NA	0.036	91.73	0.917	NA	0.917
montague	montague.A	gulf	PEI	PEI	46.1762	-62.5995	1	0	14.5	0.178	NA	0.178	0.042	0.012	NA	0.012	88.47	0.885	NA	0.885
musquodoboit	musquodoboit	atlantic	atlantic NS	NS	44.705	-63.0922	0	0	2.501	0.031	0.173	NA	0	0.000	0	NA	0	0.000	0.000	NA
neguac	neguac.B	gulf	Gulf NS + NB	NB	47.2548	-65.0593	1	0	5.066	0.062	NA	0.062	0.17	0.050	NA	0.05	95.55	0.956	NA	0.956
neguac	neguac.A	gulf	Gulf NS + NB	NB	47.2341	-65.0792	1	0	29.942	0.367	NA	0.367	0	0.000	NA	0	28.06	0.281	NA	0.281
pictou	pictou.B	gulf	Gulf NS + NB	NS	45.6749	-62.72	0	0	81.565	1	NA	1	2.013	0.596	NA	0.596	100	1.000	NA	1.000
pictou	pictou.D	gulf	Gulf NS + NB	NS	45.6678	-62.692	0	0	81.565	1	NA	1	0	0.000	NA	0	86.7	0.867	NA	0.867
pictou	pictou.A	gulf	Gulf NS + NB	NS	45.6829	-62.691	0	0	81.565	1	NA	1	3.379	1.000	NA	1	87.5	0.875	NA	0.875
pictou	pictou.C	gulf	Gulf NS + NB	NS	45.6758	-62.7413	0	0	81.565	1	NA	1	0.03	0.009	NA	0.009	64.83	0.648	NA	0.648
pinette.river	pinette.river.A	gulf	PEI	PEI	46.0584	-62.9285	0	0	4.8	0.059	NA	0.059	0.369	0.109	NA	0.109	67.93	0.679	NA	0.679
pinette.river	pinette.river.D	gulf	PEI	PEI	46.0601	-62.9099	1	0	10.9	0.134	NA	0.134	0.555	0.164	NA	0.164	85.92	0.859	NA	0.859
pinette.river	pinette.river.C	gulf	PEI	PEI	46.0585	-62.9073	1	0	10.9	0.134	NA	0.134	0.555	0.164	NA	0.164	82.77	0.828	NA	0.828
pinette.river	pinette.river.B	gulf	PEI	PEI	46.0548	-62.9105	1	0	4.6	0.056	NA	0.056	0.527	0.156	NA	0.156	75.02	0.750	NA	0.750
pokemouche	pokemouche	gulf	Gulf NS + NB	NB	47.6738	-64.8209	0	0	6.222	0.076	NA	0.076	0.673	0.199	NA	0.199	62.99	0.630	NA	0.630
port.joli	port.joli	atlantic	atlantic NS	NS	43.8417	-64.8801	0	0	1.9	0.023	0.132	NA	0	0.000	0	NA	1.61	0.016	0.018	NA
port.mouton	port.mouton.C	atlantic	atlantic NS	NS	43.9152	-64.807	0	0	2.172	0.027	0.151	NA	0	0.000	0	NA	0	0.000	0.000	NA
port.mouton	port.mouton.B	atlantic	atlantic NS	NS	43.9267	-64.8462	0	0	3.784	0.046	0.262	NA	0.711	0.210	1	NA	59.82	0.598	0.665	NA
port.mouton	port.mouton.A	atlantic	atlantic NS	NS	43.9085	-64.8187	0	0	4.104	0.05	0.285	NA	0	0.000	0	NA	18.26	0.183	0.203	NA
pugwash	pugwash.D	gulf	Gulf NS + NB	NS	45.8461	-63.665	0	0	9.185	0.113	NA	0.113	1.567	0.464	NA	0.464	71.03	0.710	NA	0.710
pugwash	pugwash.A	gulf	Gulf NS + NB	NS	45.8452	-63.664	0	0	9.185	0.113	NA	0.113	1.567	0.464	NA	0.464	72.27	0.723	NA	0.723
pugwash	pugwash.B	gulf	Gulf NS + NB	NS	45.8471	-63.66	0	0	9.185	0.113	NA	0.113	2.293	0.679	NA	0.679	79.85	0.799	NA	0.799
pugwash	pugwash.C	gulf	Gulf NS + NB	NS	45.814	-63.6592	0	0	7.29	0.089	NA	0.089	0.233	0.069	NA	0.069	15.72	0.157	NA	0.157
richiboucto	richiboucto.B	gulf	Gulf NS + NB	NB	46.6925	-64.7787	1	0	2.29	0.028	NA	0.028	0	0.000	NA	0	55.34	0.553	NA	0.553
richiboucto	richiboucto.F	gulf	Gulf NS + NB	NB	46.6897	-64.8588	1	0	8.312	0.102	NA	0.102	0.347	0.103	NA	0.103	47.89	0.479	NA	0.479
richiboucto	richiboucto.E	gulf	Gulf NS + NB	NB	46.6863	-64.847	1	0	5.595	0.069	NA	0.069	0.004	0.001	NA	0.001	21.6	0.216	NA	0.216
richiboucto	richiboucto.C	gulf	Gulf NS + NB	NB	46.6931	-64.7964	1	0	2.29	0.028	NA	0.028	0	0.000	NA	0	31.41	0.314	NA	0.314
richiboucto	richiboucto.D	gulf	Gulf NS + NB	NB	46.6994	-64.7959	1	0	1.367	0.017	NA	0.017	0	0.000	NA	0	16.45	0.165	NA	0.165
richiboucto	richiboucto.A	gulf	Gulf NS + NB	NB	46.6973	-64.7571	1	0	3.378	0.041	NA	0.041	0	0.000	NA	0	5.28	0.053	NA	0.053
richiboucto	richiboucto.G	gulf	Gulf NS + NB	NB	46.7046	-64.8562	1	1	4.2	0.051	NA	0.051	0	0.000	NA	0	14.28	0.143	NA	0.143
richiboucto	richiboucto.I	gulf	Gulf NS + NB	NB	46.7188	-64.8864	1	1	13.642	0.167	NA	0.167	0.008	0.002	NA	0.002	39.52	0.395	NA	0.395
richiboucto	richiboucto.H	gulf	Gulf NS + NB	NB	46.7123	-64.8651	1	1	7.62	0.093	NA	0.093	0.073	0.022	NA	0.022	52.99	0.530	NA	0.530
river.philip	river.philip.A	gulf	Gulf NS + NB	NS	45.85	-63.739	0	0	23.615	0.29	NA	0.29	1.468	0.434	NA	0.434	46.23	0.462	NA	0.462
river.philip	river.philip.B	gulf	Gulf NS + NB	NS	45.851	-63.749	0	0	22.425	0.275	NA	0.275	1.826	0.540	NA	0.54	47.79	0.478	NA	0.478
rustico	rustico.B	gulf	PEI	PEI	46.4158	-63.239	1	0	3	0.037	NA	0.037	0.088	0.026	NA	0.026	47.47	0.475	NA	0.475
rustico	rustico.A	gulf	PEI	PEI	46.4312	-63.272	1	0	2.2	0.027	NA	0.027	0	0.000	NA	0	19.47	0.195	NA	0.195
sambro	sambro	atlantic	atlantic NS	NS	44.455	-63.589	0	0	2.58	0.032	0.179	NA	0	0.000	0	NA	0	0.000	0.000	NA
second.peninsula	second.peninsula	atlantic	atlantic NS	NS	44.3967	-64.2806	0	0	14.424	0.177	1	NA	0.05	0.015	0.071	NA	33.52	0.335	0.373	NA
shediac	shediac.D	gulf	Gulf NS + NB	NB	46.2746	-64.572	0	0	17.657	0.216	NA	0.216	0.233	0.069	NA	0.069	58.44	0.584	NA	0.584
shediac	shediac.E	gulf	Gulf NS + NB	NB	46.2795	-64.5726	0	0	17.657	0.216	NA	0.216	0.229	0.068	NA	0.068	59.05	0.591	NA	0.591
shediac	shediac.C	gulf	Gulf NS + NB	NB	46.2735	-64.5763	0	0	38.342	0.47	NA	0.47	0.65	0.192	NA	0.192	66.58	0.666	NA	0.666
shediac	shediac.A	gulf	Gulf NS + NB	NB	46.2388	-64.524	0	0	8.85	0.109	NA	0.109	2.761	0.817	NA	0.817	42.69	0.427	NA	0.427
shediac	shediac.B	gulf	Gulf NS + NB	NB	46.2634	-64.564	1	0	4.371	0.054	NA	0.054	0	0.000	NA	0	76.17	0.762	NA	0.762
souris	souris.C	gulf	PEI	PEI	46.3656	-62.277	1	0	8.3	0.102	NA	0.102	0.219	0.065	NA	0.065	83.4	0.834	NA	0.834
souris	souris.B	gulf	PEI	PEI	46.3609	-62.28	1	0	8.3	0.102	NA	0.102	0	0.000	NA	0	63.1	0.631	NA	0.631
souris	souris.A	gulf	PEI	PEI	46.3501	-62.277	1	1	6.3	0.077	NA	0.077	0.088	0.026	NA	0.026	56.2	0.562	NA	0.562
south.lake	south.lake.C	gulf	PEI	PEI	46.4123	-62.054	1	0	39.7	0.487	NA	0.487	0	0.000	NA	0	19.8	0.198	NA	0.198
south.lake	south.lake.B	gulf	PEI	PEI	46.412	-62.051	1	1	39.7	0.487	NA	0.487	0	0.000	NA	0	18.76	0.188	NA	0.188
south.lake	south.lake.A	gulf	PEI	PEI	46.4141	-62.042	1	1	6	0.074	NA	0.074	0	0.000	NA	0	17.59	0.176	NA	0.176
southwest	southwest	gulf	PEI	PEI	46.48	-63.5	1	0	2.7	0.033	NA	0.033	0.25	0.074	NA	0.074	80.97	0.810	NA	0.810
st.louis.de.kent	st.louis.de.kent.C	gulf	Gulf NS + NB	NB	46.7469	-64.9704	0	0	47.393	0.581	NA	0.581	1.264	0.374	NA	0.374	49.38	0.494	NA	0.494
st.louis.de.kent	st.louis.de.kent.A	gulf	Gulf NS + NB	NB	46.7663	-64.9112	0	0	22.375	0.274	NA	0.274	0.544	0.161	NA	0.161	0.05	0.001	NA	0.001
st.louis.de.kent	st.louis.de.kent.B	gulf	Gulf NS + NB	NB	46.7573	-64.917	0	0	25.308	0.31	NA	0.31	0.565	0.167	NA	0.167	0.05	0.001	NA	0.001
st.margarets.bay	st.margarets.bay.B	atlantic	atlantic NS	NS	44.6388	-63.9576	0	0	13.102	0.161	0.908	NA	0	0.000	0	NA	11.53	0.115	0.128	NA
st.margarets.bay	st.margarets.bay.A	atlantic	atlantic NS	NS	44.648	-63.9522	0	0	13.102	0.161	0.908	NA	0.065	0.019	0.092	NA	52.65	0.527	0.585	NA
st.margarets.bay	st.margarets.bay.C	atlantic	atlantic NS	NS	44.5925	-63.9438	0	0	4.388	0.054	0.304	NA	0	0.000	0	NA	2.74	0.027	0.030	NA
st.marys.bay	st.marys.bay.H	gulf	PEI	PEI	46.1225	-62.5342	0	0	25.3	0.31	NA	0.31	0.034	0.010	NA	0.01	79.25	0.793	NA	0.793
st.marys.bay	st.marys.bay.I	gulf	PEI	PEI	46.1582	-62.5262	0	0	3	0.037	NA	0.037	0	0.000	NA	0	86.29	0.863	NA	0.863
st.marys.bay	st.marys.bay.B	gulf	PEI	PEI	46.131	-62.4693	1	0	1.9	0.023	NA	0.023	0	0.000	NA	0	34.96	0.350	NA	0.350
st.marys.bay	st.marys.bay.J	gulf	PEI	PEI	46.1662	-62.5388	1	0	12.9	0.158	NA	0.158	0	0.000	NA	0	94.14	0.941	NA	0.941
st.marys.bay	st.marys.bay.E	gulf	PEI	PEI	46.1222	-62.4883	1	0	2.3	0.028	NA	0.028	0	0.000	NA	0	83.04	0.830	NA	0.830
st.marys.bay	st.marys.bay.C	gulf	PEI	PEI	46.1255	-62.4683	1	0	2.3	0.028	NA	0.028	0	0.000	NA	0	31.48	0.315	NA	0.315
st.marys.bay	st.marys.bay.D	gulf	PEI	PEI	46.12	-62.4838	1	0	2.2	0.027	NA	0.027	0	0.000	NA	0	82.5	0.825	NA	0.825
st.marys.bay	st.marys.bay.A	gulf	PEI	PEI	46.1418	-62.4988	1	0	12.9	0.158	NA	0.158	0	0.000	NA	0	54.36	0.544	NA	0.544
st.marys.bay	st.marys.bay.G	gulf	PEI	PEI	46.1233	-62.5315	1	0	15.1	0.185	NA	0.185	0.034	0.010	NA	0.01	74.42	0.744	NA	0.744
st.marys.bay	st.marys.bay.F	gulf	PEI	PEI	46.1133	-62.4987	1	0	4.5	0.055	NA	0.055	0	0.000	NA	0	67.2	0.672	NA	0.672
st.simon.north	st.simon.north.B	gulf	Gulf NS + NB	NB	47.7515	-64.832	1	1	5.911	0.072	NA	0.072	0	0.000	NA	0	18	0.180	NA	0.180
st.simon.north	st.simon.north.A	gulf	Gulf NS + NB	NB	47.7488	-64.81	1	1	1.622	0.02	NA	0.02	0	0.000	NA	0	10.31	0.103	NA	0.103
st.simon.south	st.simon.south.A	gulf	Gulf NS + NB	NB	47.732	-64.7765	1	1	4.107	0.05	NA	0.05	0	0.000	NA	0	24.17	0.242	NA	0.242
st.simon.south	st.simon.south.B	gulf	Gulf NS + NB	NB	47.7199	-64.7609	1	1	4.107	0.05	NA	0.05	0	0.000	NA	0	2.23	0.022	NA	0.022
stanley.trout	stanley.trout.A	gulf	PEI	PEI	46.4448	-63.4732	0	0	6	0.074	NA	0.074	0.276	0.082	NA	0.082	82.68	0.827	NA	0.827
stanley.trout	stanley.trout.E	gulf	PEI	PEI	46.4692	-63.45	1	0	7.7	0.094	NA	0.094	0.166	0.049	NA	0.049	76.91	0.769	NA	0.769
stanley.trout	stanley.trout.B	gulf	PEI	PEI	46.4484	-63.4658	1	0	7.1	0.087	NA	0.087	0.528	0.156	NA	0.156	77.06	0.771	NA	0.771
stanley.trout	stanley.trout.C	gulf	PEI	PEI	46.4582	-63.4614	1	0	7	0.086	NA	0.086	0.341	0.101	NA	0.101	70.55	0.706	NA	0.706
stanley.trout	stanley.trout.D	gulf	PEI	PEI	46.47	-63.46	1	1	6.4	0.078	NA	0.078	0.159	0.047	NA	0.047	77.27	0.773	NA	0.773
tabusintac	tabusintac.A	gulf	Gulf NS + NB	NB	47.3402	-64.9721	1	0	13.076	0.16	NA	0.16	0.182	0.054	NA	0.054	36.24	0.362	NA	0.362
tabusintac	tabusintac.E	gulf	Gulf NS + NB	NB	47.3763	-64.9381	1	0	4.625	0.057	NA	0.057	0	0.000	NA	0	11.04	0.110	NA	0.110
tabusintac	tabusintac.B	gulf	Gulf NS + NB	NB	47.3485	-64.9583	1	1	5.791	0.071	NA	0.071	0	0.000	NA	0	6.31	0.063	NA	0.063
tabusintac	tabusintac.C	gulf	Gulf NS + NB	NB	47.3454	-64.9509	1	1	5.791	0.071	NA	0.071	0	0.000	NA	0	1.16	0.012	NA	0.012
tabusintac	tabusintac.D	gulf	Gulf NS + NB	NB	47.37	-64.94	1	1	4.625	0.057	NA	0.057	0	0.000	NA	0	9.28	0.093	NA	0.093
tatamagouche	tatamagouche.B	gulf	Gulf NS + NB	NS	45.7568	-63.0844	0	0	0	0	NA	0	0	0.000	NA	0	32.82	0.328	NA	0.328
tatamagouche	tatamagouche.A	gulf	Gulf NS + NB	NS	45.756	-63.339	1	0	0	0	NA	0	0	0.000	NA	0	19.17	0.192	NA	0.192
taylors.head	taylors.head	atlantic	atlantic NS	NS	44.8235	-62.5764	0	0	1.91	0.023	0.132	NA	0	0.000	0	NA	0	0.000	0.000	NA
tracadie	tracadie.A	gulf	Gulf NS + NB	NB	47.4644	-64.8861	0	0	2.55	0.031	NA	0.031	0.243	0.072	NA	0.072	70.16	0.702	NA	0.702
tracadie	tracadie.B	gulf	Gulf NS + NB	NB	47.4735	-64.8737	0	0	2.444	0.03	NA	0.03	0.003	0.001	NA	0.001	28.21	0.282	NA	0.282
tracadie	tracadie.D	gulf	Gulf NS + NB	NB	47.5277	-64.894	0	0	5.052	0.062	NA	0.062	0	0.000	NA	0	27.04	0.270	NA	0.270
tracadie	tracadie.C	gulf	Gulf NS + NB	NB	47.5169	-64.8997	1	0	5.492	0.067	NA	0.067	0	0.000	NA	0	73.72	0.737	NA	0.737
tracadie	tracadie.E	gulf	Gulf NS + NB	NB	47.5641	-64.8885	1	0	13.75	0.169	NA	0.169	0	0.000	NA	0	24.71	0.247	NA	0.247
